# Supplementary material for: Anchoring of NiCox alloy nanoparticles on nitrogen vacancy-rich carbon nitride nanotubes toward promoting efficiently photocatalytic CO2 conversion into solar fuel
Source: Royal Society of Chemistry journal article supplement (doi:10.1039/d4cy00626g), 2024-01-01
Supplement: d4cy00626g1.pdf [file d4cy00626g1.pdf]

1 **Anchoring of NiCo<sub>x</sub> Alloy Nanoparticles on Nitrogen Vacancy-Rich Carbon Nitride**  
2 **Nanotubes toward Promoting Efficiently Photocatalytic CO<sub>2</sub> Conversion into Solar Fuel**

3

4 *Qingqing Zhang<sup>\*,a,†</sup>, Bo Tao<sup>b,†</sup>, Chen Zhao<sup>a</sup>, Zongyan Zhao,<sup>\*,c</sup> Hui Wu<sup>a</sup>, Xiaohui Zhong<sup>a</sup>,*  
5 *Zhigang Zou<sup>b,d</sup> and Yong Zhou<sup>\*,a,b,d</sup>*

6

7 <sup>a</sup>. School of Chemical and Environmental Engineering, Anhui Polytechnic University, Wuhu,  
8 Anhui, 241000, P. R. China.

9 <sup>b</sup>. Key Laboratory of Modern Acoustics (MOE), Institute of Acoustics, School of Physics,  
10 National Laboratory of Solid State Microstructures, Collaborative Innovation Center of  
11 Advanced Microstructures, Eco-Materials and Renewable Energy Research Center (ERERC),  
12 Jiangsu Key Laboratory for Nano Technology, Nanjing University, Nanjing, Jiangsu, 210093,  
13 P. R. China.

14 <sup>c</sup>. Faculty of Materials Science and Engineering, Kunming University of Science and  
15 Technology, Kunming 650093, P. R. China. Email: [zzy@kust.edu.cn](mailto:zzy@kust.edu.cn)

16 <sup>d</sup>. School of Science and Engineering, The Chinese University of Hongkong (Shenzhen),  
17 Shenzhen, Guangdong, 518172, P. R. China.

18 \* Correspondence: [zhouyong1999@nju.edu.cn](mailto:zhouyong1999@nju.edu.cn)

19 † These authors contributed equally to this work.

20

## 1 **1. Experimental Details**

2 **Chemicals and Materials:** Melamine ( $C_3H_6N_6$ , Sigma-Aldrich, 99%), nitric acid ( $HNO_3$ , Nanjing Chemical  
3 Reagent Co., Ltd., 68%), ethylene glycol ( $C_2H_6O_2$ , Sigma-Aldrich, 99%), nickel nitrate hexahydrate  
4 ( $Ni(NO_3)_2 \cdot 6H_2O$ , Sigma-Aldrich, 99%), and cobaltous nitrate hexahydrate ( $Co(NO_3)_2 \cdot 6H_2O$ , Sigma-  
5 Aldrich, 99%) were used as received without any purification.

6 **Synthesis of  $V_N$ -CNNTs:** Nitrogen vacancy-rich carbon nitride nanotubes ( $V_N$ -CNNTs) were synthesized *via*  
7 calcination protonated melamine precursors that resulted from morphological transformation of melamine in  
8 nitric acid. Typically, melamine (4 g) was dissolved into ethylene glycol (100 mL) under 100 °C. Afterward,  
9  $HNO_3$  was dropwise added into the solution. After reaction, the produced white precipitates were collected  
10 by centrifugation, rinsed with ethanol, and dried at 80 °C overnight, resulting in protonated melamine  
11 precursors. The as-prepared protonated melamine precursors were calcined at 550 °C for 2 h with a heating  
12 rate of 2 °C  $min^{-1}$  under an Ar flow, and cooled down naturally, achieving a yellow product. The synthesized  
13 materials were labeled as  $V_N$ -CNNTs. For comparison, bulk carbon nitride (BCN) was directly synthesized  
14 by calcinating melamine at 550 °C for 2 h.

15 **Synthesis of  $NiCo/V_N$ -CNNTs:** NiCo alloy nanoparticles (NPs) were deposited on  $V_N$ -CNNTs with a  
16 modulatory loading weights of alloy NPs to  $V_N$ -CNNTs through a facile chemical reduction method.  
17 Typically,  $V_N$ -CNNTs (0.5 g) was dispersed in 100 mL ethanol. Subsequently, stoichiometric amounts of  
18  $Ni(NO_3)_2 \cdot 6H_2O$  and  $Co(NO_3)_2 \cdot 6H_2O$  (mole ratio of Ni:Co from 0.2 to 0.6) were dissolved in the ethanol  
19 solution, followed by stirring in an ice-bath for 2 h. Afterward, the excess  $NaBH_4$  (0.1 mol  $L^{-1}$ ) was added  
20 into the mixture and stirring for 12 h. The final products were collected by washing with water and ethanol  
21 and dried at 80 °C under vacuum condition. The obtained materials were denoted as  $NiCo_x/V_N$ -CNNTs,  
22 where x represented the molar ratio of Ni to Co ( $x = 0.2-0.6$ ). For comparison, the contrast samples of  
23  $Ni/V_N$ -CNNTs and  $Co/V_N$ -CNNTs were fabricated according to the same method with  $NiCo_{0.4}/V_N$ -CNNTs  
24 except that  $Co(NO_3)_2 \cdot 6H_2O$  or  $Ni(NO_3)_2 \cdot 6H_2O$  were not added.

25 **Characterization:** Transmission electron microscope (TEM) images were collected on a JEOL 3010  
26 microscope operated at 300 kV. The specific surface area was measured by nitrogen adsorption-desorption  
27 using Micromeritics TriStar specific surface area analyzer operating at 77 K and calculated by  
28 Brunauer-Emmett-Teller (BET) method. Power X-ray diffraction patterns (XRD) were recorded on a Rigaku

1 Ultima III diffractometer using a Cu  $K\alpha$  X-ray radiation. Fourier transform infrared spectra (FTIR) were  
2 collected on a Nicolet Nexus-870 FTIR spectrometer with KBr pellets. X-ray photoelectron spectroscopy  
3 (XPS) was obtained by Thermo Fisher Scientific ESCALAB 250 X-ray photoelectron spectrometer with an  
4 Al  $K\alpha$  X-ray source, and the binding energy was standardized using the adventitious C1s peak at 284.6 eV.  
5 Ultraviolet–visible spectrophotometer (UV–vis) was hired to record the UV-visible diffuse reflectance  
6 spectra on Shimadzu UV-2550 and switched to the absorption spectrum on the basis of the Kubelka–Munk  
7 connection at room temperature. Steady-state photoluminescence (PL) spectra were obtained with  
8 PerkinElmer LS55 fluorescence spectrometer. Electron paramagnetic resonance (EPR) spectra were  
9 collected from the EMX 10/12 EPR spectrometer operating at 9.788 GHz.

10 **Photoelectrochemical Measurements:** All photoelectrochemical measurements were conducted in an  
11 electrochemical workstation (CHI-660E, Shanghai Chen Hua Co., Ltd.) with a three-electrode cell system, in  
12 which fluorine-tin oxide (FTO) glass carbon electrode, Pt wire, and saturated Ag/AgCl serving as working  
13 electrode, counter electrode, and reference electrode, respectively. The working electrode was prepared by  
14 dispersing 30 mg photocatalyst in 30 mL acetone, followed by 15 mg iodine. The suspension liquid was  
15 evenly deposited on the 1 cm<sup>2</sup> FTO glass electrode by electrophoresis and dried naturally at room  
16 temperature.

17 **Computational Details:** All calculations were based on density functional theory and performed using the  
18 Cambridge Serial Total Energy Package (CASTEP) codes, employing the on-the-fly ultrasoft  
19 pseudopotential. The Perdew-Burke-Ernzerhof (PBE) exchange-correlation functional at the generalized  
20 gradient approximation (GGA) level was utilized. The Kohn-Sham wave functions of the valence electrons  
21 were described by a plane-wave basis set with an energy cutoff of 570 eV. For geometric optimization, the  
22 Broyden-Fletcher-Goldfarb-Shanno (BFGS) scheme was selected as the minimization algorithm. The  
23 Monkhorst-Pack scheme was applied for the K-points grid sampling with a setting of  $5 \times 5 \times 1$  for the  
24 irreducible Brillouin zone. The atomic coordinates were optimized to achieve accurate geometry, and the  
25 convergence criteria for structure optimizations were defined as follows: a maximum force tolerance of  
26 0.03 eV/Å, a maximum stress tolerance of 0.05 GPa, a maximum displacement tolerance of  $1 \times 10^{-3}$  Å, and  
27 a maximal energy change per atom of  $1 \times 10^{-5}$  eV. Meanwhile, the self-consistent field tolerance was set to  
28  $5 \times 10^{-7}$  eV/atom. To obtain a more precise electronic structure, the HSE06 hybrid functional was employed

1 for the calculation based on the optimized structure. In order to accurately calculate the van der Waals  
2 interaction between two layers, we used the Grimme dispersion correction method in DFT-D.

3 In this work, we initiated by optimizing the bulk model of  $C_3H_4$ , yielding the following crystalline  
4 parameters:  $a = 7.148 \text{ \AA}$ ,  $b = 12.397 \text{ \AA}$ ,  $c = 24.748 \text{ \AA}$ . Subsequently, we exfoliated a monolayer of  $g\text{-}C_3N_4$   
5 from  $2 \times 1 \times 1$  supercell, and removed a nitrogen atom from it, resulting in the  $V_N\text{-}C_3H_4$  model (total atom: 55)  
6 with 20- $\text{\AA}$ -thickness vacuum layer. NiCo alloy nanoparticles were constructed based on optimized FCC-Ni  
7 metal. The adsorption position of reactants was determined by simulated annealing method. To gain insight  
8 into the  $CO_2$  adsorption and activation, we have employed first-principles simulation to examine the  $CO_2$   
9 adsorption on the surface of NiCo alloy nanoparticles. The stable adsorption sites of  $CO_2$  and active reaction  
10 sites of  $CO_2$ -to- $CH_4$  conversion are Co atoms.

## 1 2. Characterizations

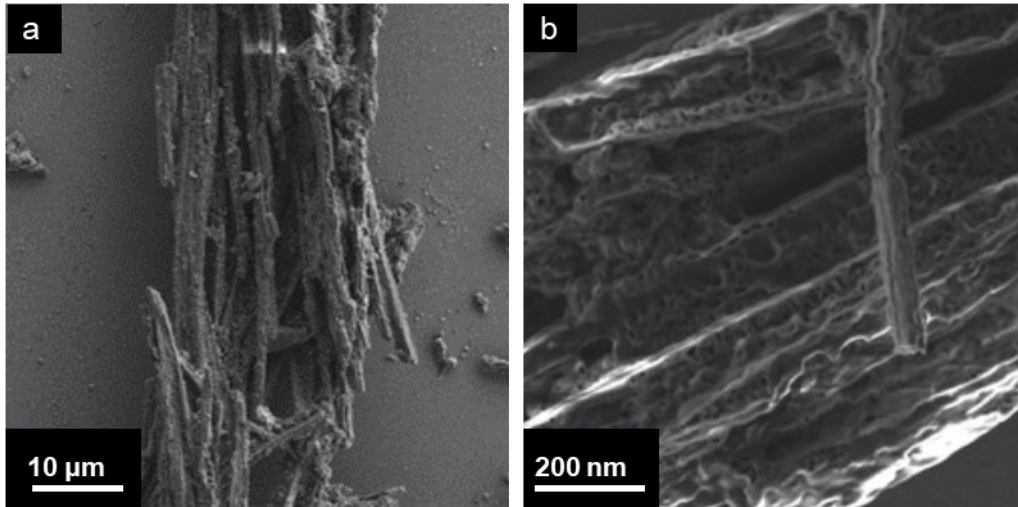

**Fig. S1** (a-b) SEM images of  $V_N$ -CNNTs.

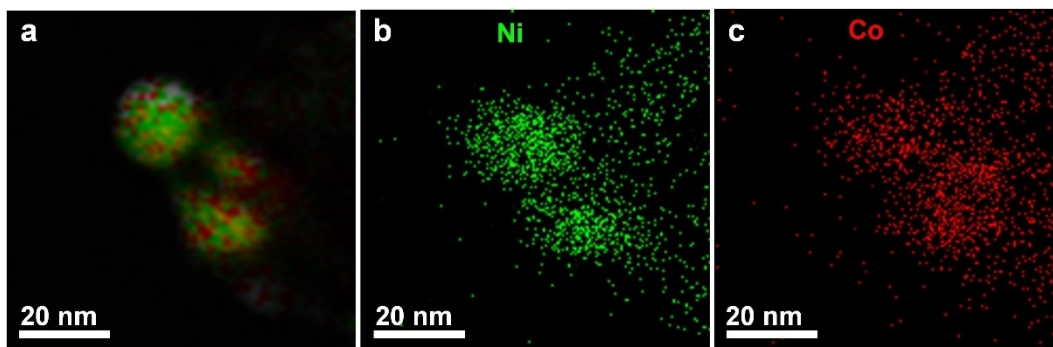

**Fig. S2** (a) STEM and the corresponding (b-c) EDS-mapping images of  $\text{NiCo}_{0.4}/\text{V}_\text{N}$ -CNNTs.

1

2

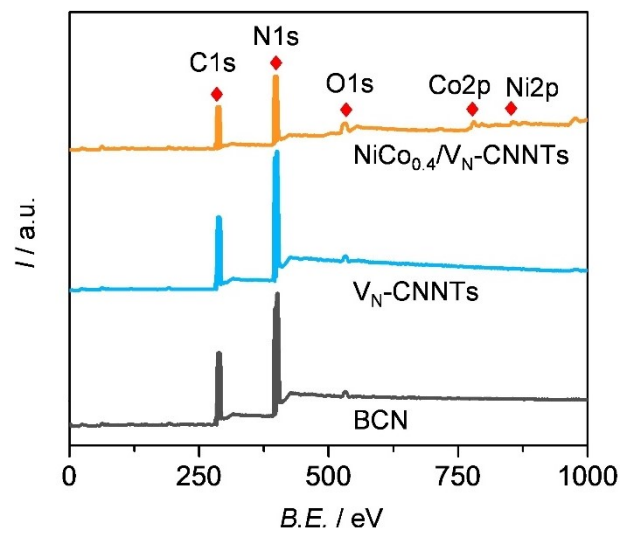

**Fig. S3** XPS survey spectra of BCN,  $V_N$ -CNNTs and  $NiCo_{0.4}/V_N$ -CNNTs.

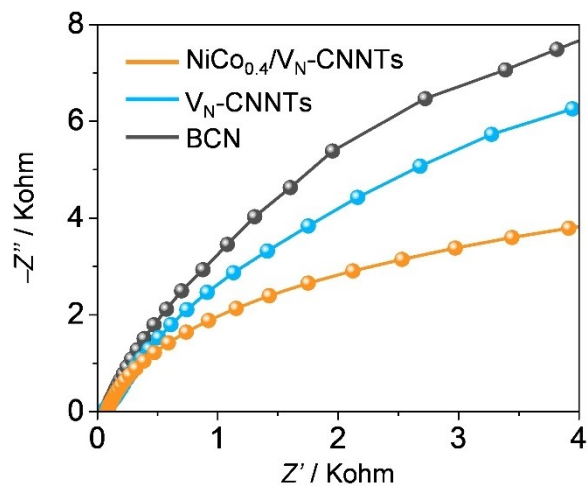

**Fig. S4** The electrochemical impedance spectra of BCN, V<sub>N</sub>-CNNTs and NiCo<sub>0.4</sub>/V<sub>N</sub>-CNNTs.

1  
2



1 **Table S1** The reported bimetallic catalytic systems in photocatalytic CO<sub>2</sub> reduction and their  
 2 corresponding ratio of CH<sub>4</sub>/CO evolution rate.

| Entry | Catalyst                                                             | Light         | Oxidant          | $r_{CH_4}/r_{CO}$ | Ref.                                                                 |
|-------|----------------------------------------------------------------------|---------------|------------------|-------------------|----------------------------------------------------------------------|
| 1     | Mn <sub>1</sub> Co <sub>1</sub> /CN                                  | 300 W Xe lamp | H <sub>2</sub> O | 0.01              | <i>Angew. Chem. Int. Edit.</i> <b>2022</b> , <i>61</i> , e202206579. |
| 2     | Ni/Mn-Oxo/g-C <sub>3</sub> N <sub>4</sub>                            | 300 W Xe lamp | H <sub>2</sub> O | 0.16              | <i>Sol. RRL</i> <b>2021</b> , <i>5</i> , 2000472.                    |
| 3     | Co <sub>1</sub> Ag <sub>(1+n)</sub> /PCN                             | 300 W Xe lamp | H <sub>2</sub> O | 0.11              | <i>ACS Nano</i> <b>2023</b> , <i>17</i> , 11869.                     |
| 4     | g-C <sub>3</sub> N <sub>4</sub> -Co <sub>1.6</sub> Ni <sub>0.4</sub> | 300 W Xe lamp | H <sub>2</sub> O | 0.09              | <i>J. Colloid Interf. Sci.</i> <b>2022</b> , <i>625</i> , 722.       |
| 5     | PtCu-crCN                                                            | 300 W Xe lamp | H <sub>2</sub> O | 0.24              | <i>Chinese J Catal.</i> <b>2022</b> , <i>43</i> , 451.               |
| 6     | CoRu-HCNp                                                            | 300 W Xe lamp | H <sub>2</sub> O | 0.09              | <i>Adv. Mater.</i> <b>2021</b> , <i>33</i> , 2105135.                |
| 7     | 1Cu-1Mn/mCN                                                          | 300 W Xe lamp | H <sub>2</sub> O | 0.13              | <i>Appl. Surf. Sci.</i> <b>2019</b> , <i>492</i> , 125.              |
| 8     | Pd <sub>1</sub> -Cu <sub>1</sub> /CN                                 | 300 W Xe lamp | H <sub>2</sub> O | 0.09              | <i>Small</i> , <b>2024</b> , <i>20</i> , 2308767.                    |
| 9     | NiCo <sub>0.4</sub> /V <sub>N</sub> -CNNTs                           | 300 W Xe lamp | H <sub>2</sub> O | 0.56              | This work                                                            |
